# Supplementary figures and images for: McMaster Mesonet soil moisture dataset: description and spatio-temporal variability analysis
Source: Copernicus journal article supplement (doi:10.5194/hess-17-1589-2013), 2013-04-29

Kelso 1

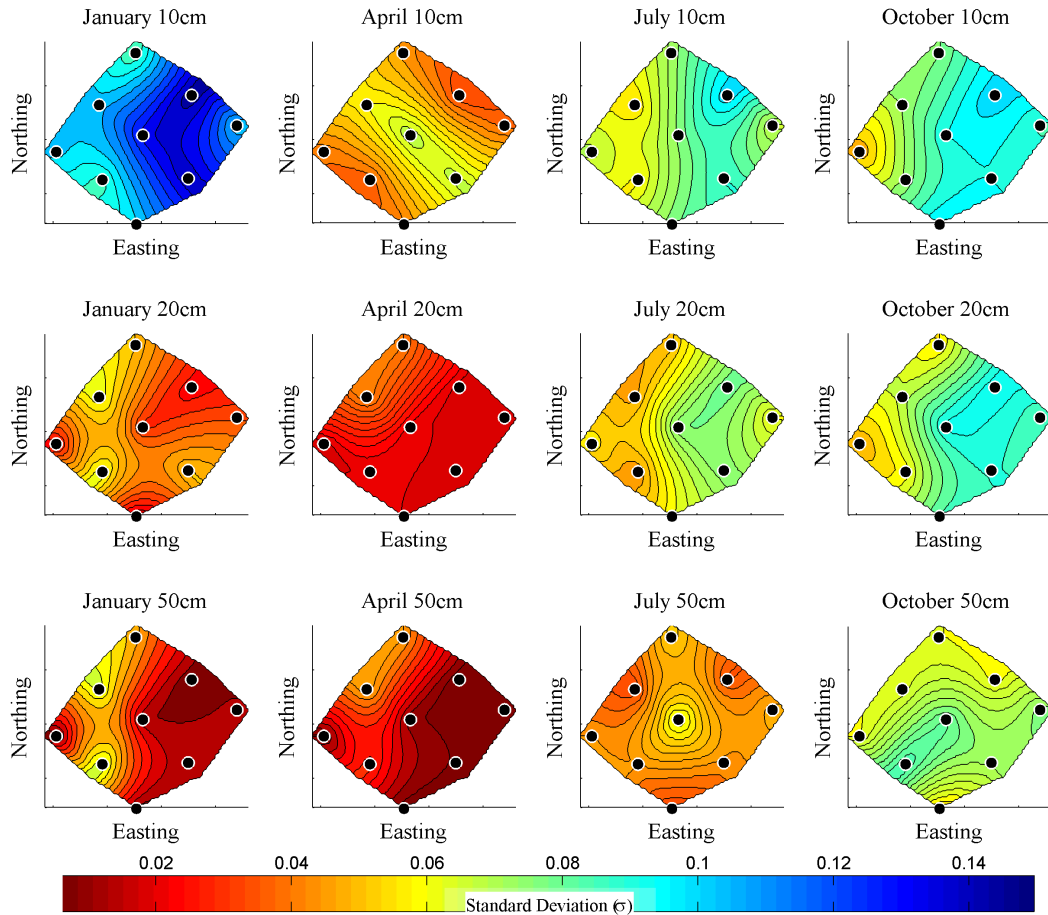

Kelso 2

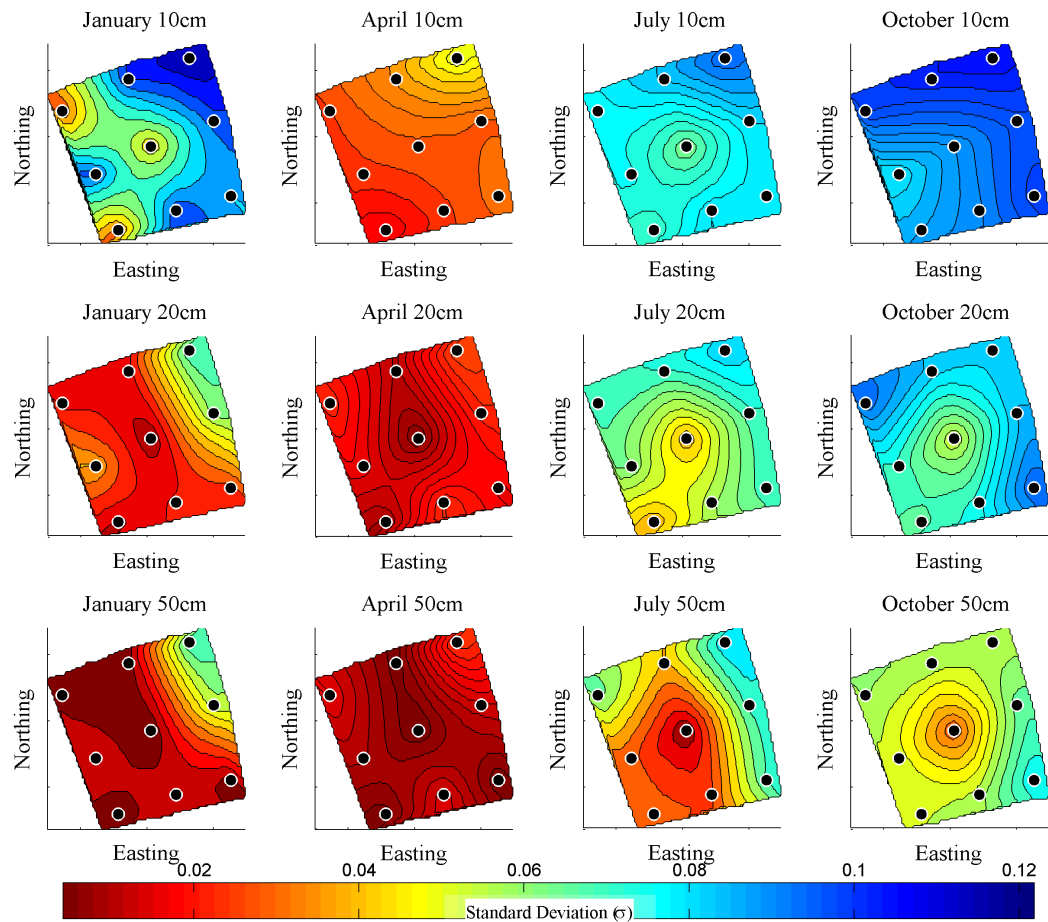

Orchard

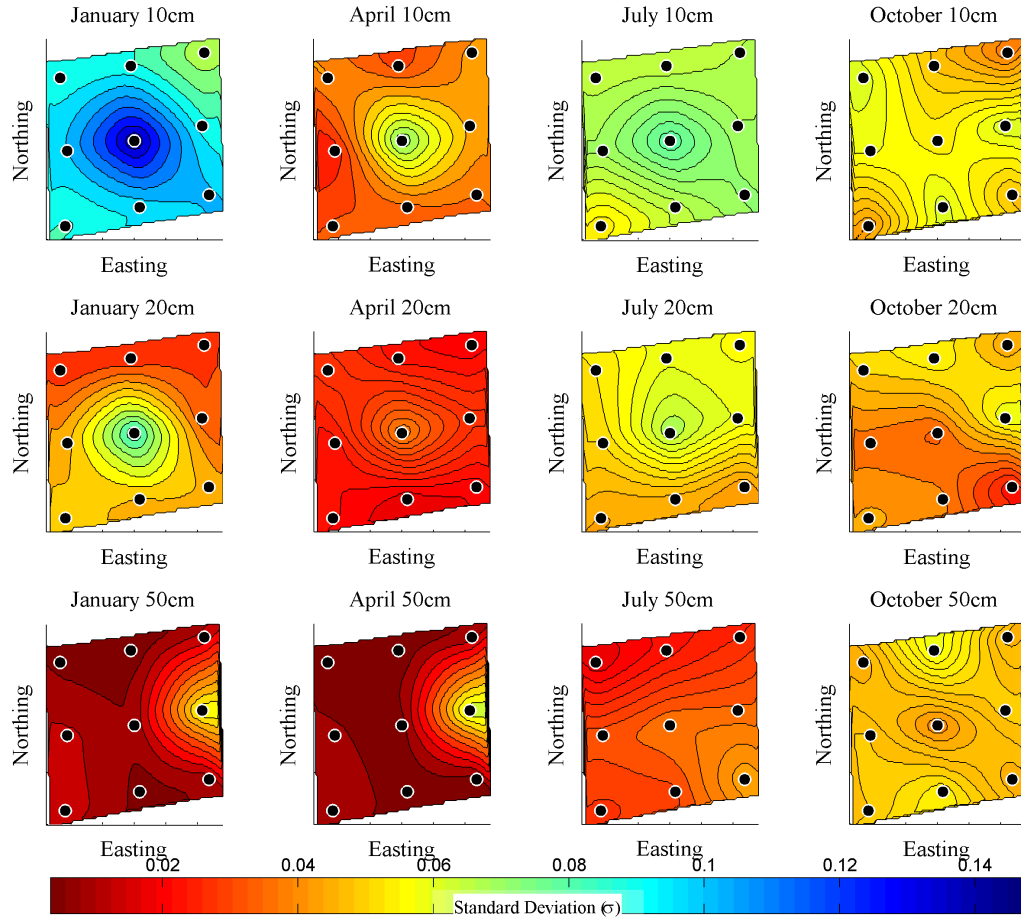

Governor Road

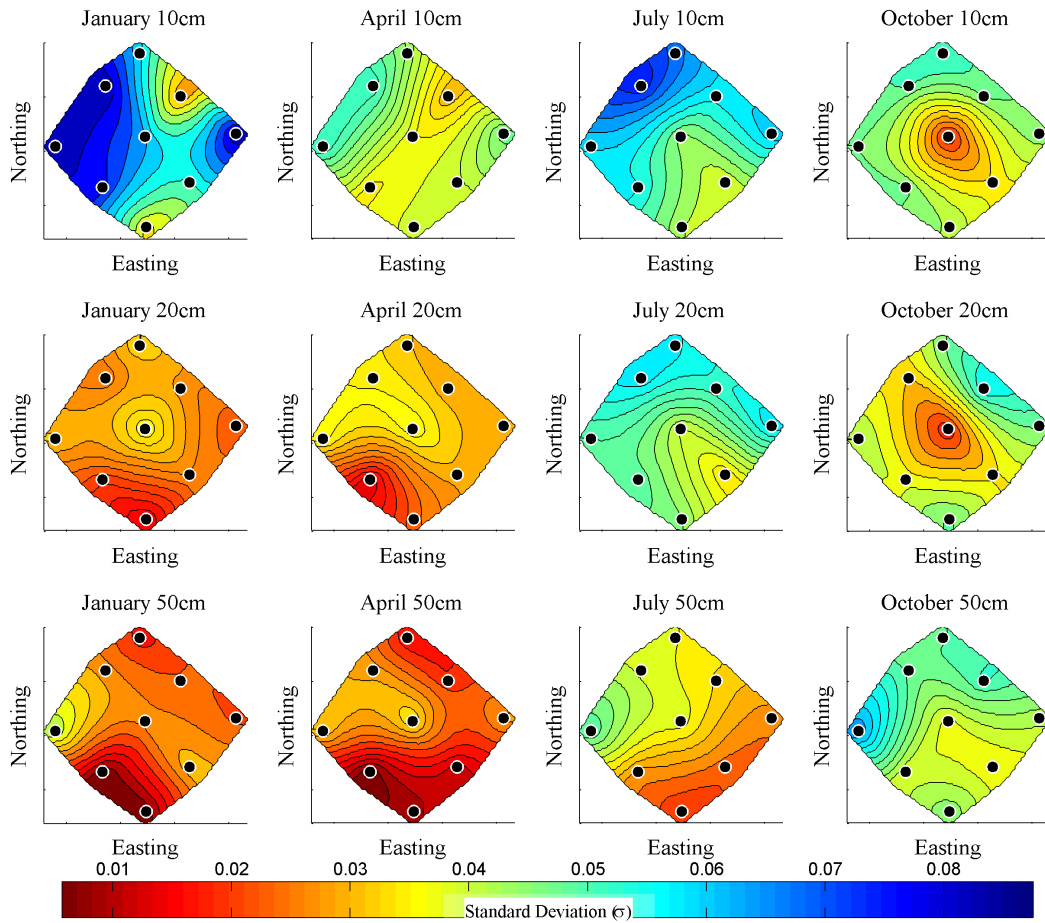

Supplement: Supplementary file 1 [file hess-17-1589-2013-supplement.pdf]
